# Supplementary material for: Mortality Risk for Docetaxel-Treated, High-Grade Prostate Cancer With Low PSA Levels: A Meta-Analysis
Source: PubMed Central journal article supplement (PMC10620614; doi:10.1001/jamanetworkopen.2023.40787), 2023-11-01
Supplement: jamanetwopen-e2340787-s001.pdf [file jamanetwopen-e2340787-s001.pdf]

## Data Sharing Statement

Mahal. Mortality Risk for Docetaxel-Treated, High-Grade Prostate Cancer With Low PSA Levels. *JAMA Netw Open*. Published November 01, 2023.

doi:10.1001/jamanetworkopen.2023.40787

### Data

**Data available:** No

### Additional Information

**Explanation for why data not available:** Any investigator can request data from the ICECaP consortium data base by contacting Wanling Xie and Christopher Sweeney and Praful Ravi (co-authors on the current study)
